# Supplementary material for: Antiferroelectric-to-ferroelectric phase transition in hexagonal rare-earth iron oxides
Source: Royal Society of Chemistry journal article supplement (doi:10.1039/d1tc05944k), 2022-01-01
Supplement: d1tc05944k1.pdf [file d1tc05944k1.pdf]

Supporting information for:

**Antiferroelectric-to-ferroelectric phase transition in hexagonal rare-earth  
iron oxides**

Binjie Chen<sup>1</sup>, Tetsuya Hasegawa<sup>2</sup>, Hiromichi Ohta<sup>3</sup>, Tsukasa Katayama<sup>3,4\*</sup>

<sup>1</sup>Graduate School of Information Science and Technology, Hokkaido University, N14W9, Kita,  
Sapporo 060-0814, Japan.

<sup>2</sup>Department of Chemistry, The University of Tokyo, Bunkyo, Tokyo 113-0033, Japan.

<sup>3</sup>Research Institute for Electronic Science, Hokkaido University, N20W10, Kita, Sapporo 001-0020,  
Japan.

<sup>4</sup>JST-PRESTO, Kawaguchi, Saitama 332-0012, Japan

\*Corresponding author: [katayama@es.hokudai.ac.jp](mailto:katayama@es.hokudai.ac.jp)

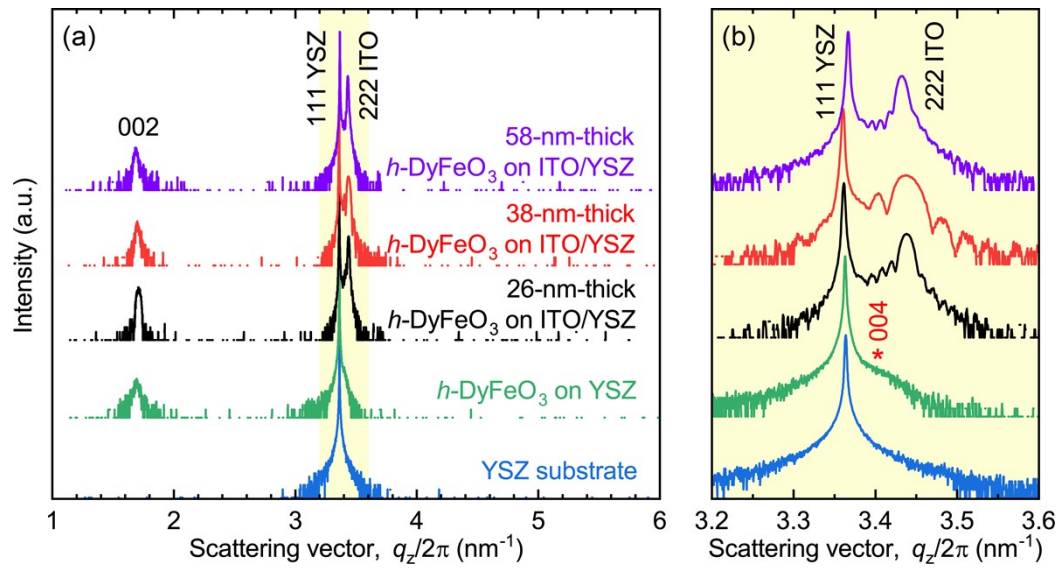

**Figure S1.** (a) Out-of-plane XRD patterns of the *h*-DyFeO<sub>3</sub> films fabricated on ITO/YSZ and YSZ substrates. (b) The magnified patterns of (a). For the *h*-DyFeO<sub>3</sub> films grown on ITO/YSZ, 004 diffraction peak of *h*-DyFeO<sub>3</sub> ( $q_z/2\pi = 3.4 \text{ nm}^{-1}$ ) was hardly observed because the peak is overlapped with 111 YSZ ( $q_z/2\pi = 3.36 \text{ nm}^{-1}$ ) and 222 ITO ( $q_z/2\pi = 3.44 \text{ nm}^{-1}$ ). The 004 *h*-DyFeO<sub>3</sub> is detected by comparing it to the magnified patterns of *h*-DyFeO<sub>3</sub>/YSZ film and YSZ substrate.

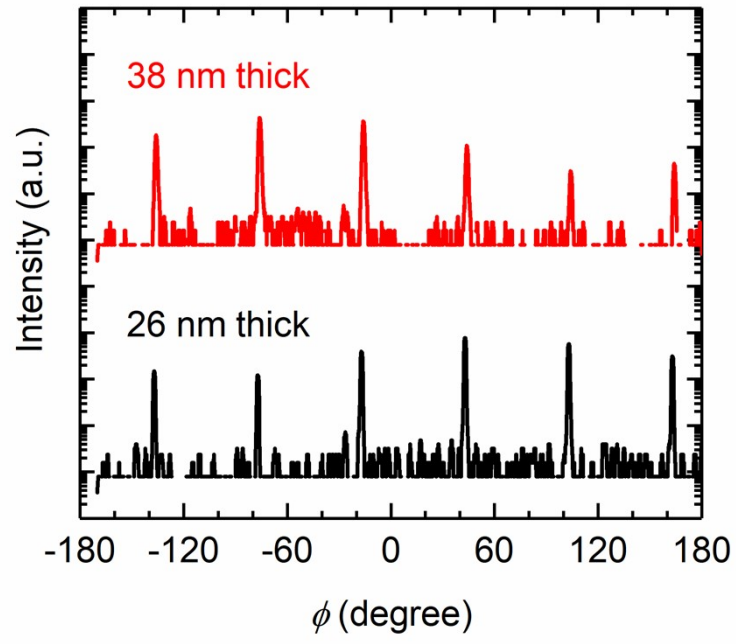

**Figure S2.**  $\phi$ -scan pattern of the  $h$ -DyFeO<sub>3</sub> films as a function of thickness around the 110  $h$ -DyFeO<sub>3</sub> diffraction peaks.

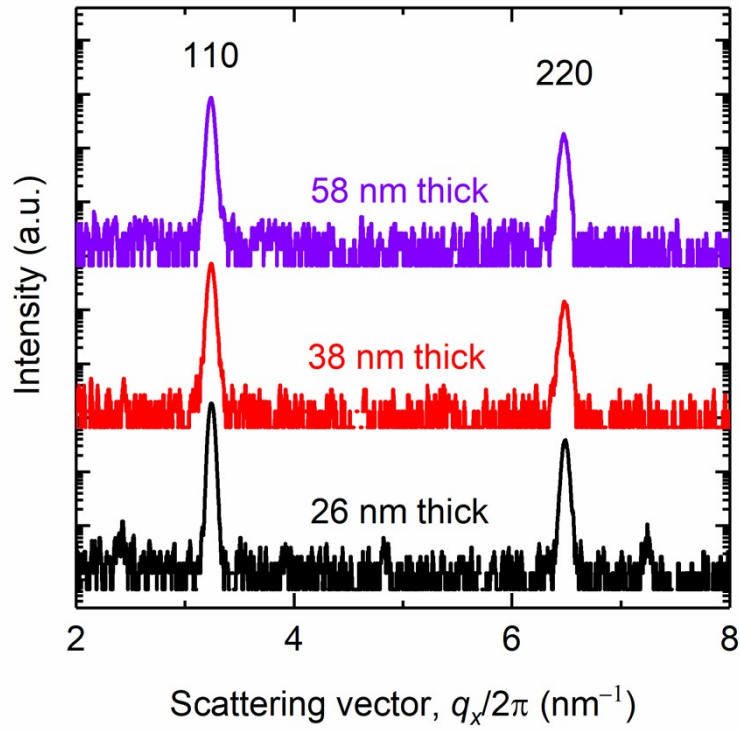

**Figure S3.** In-plane XRD patterns along the [11-2] YSZ direction for the  $h$ -DyFeO<sub>3</sub> films with varied thickness.

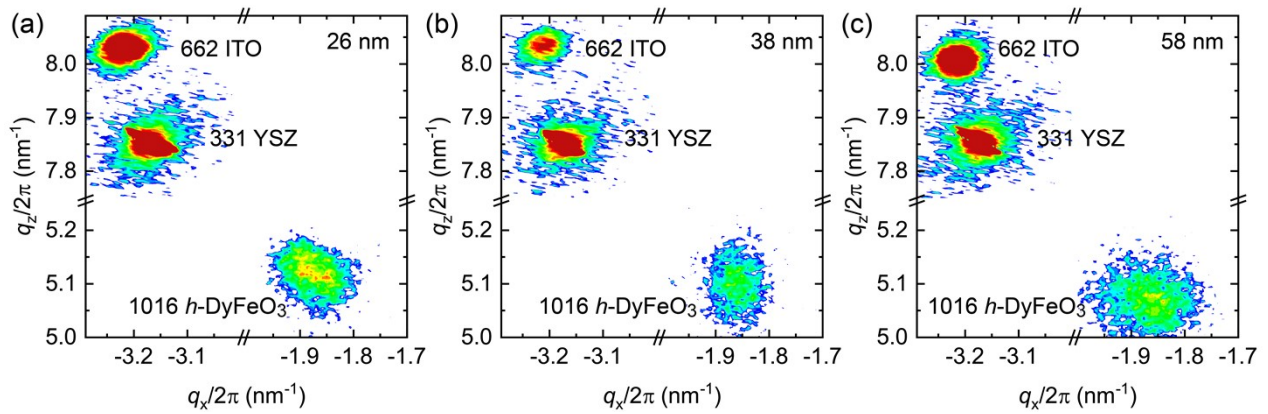

**Figure S4.** RSMs of the  $h$ -DyFeO<sub>3</sub> films. (a) 26 nm, (b) 38 nm, and (c) 58 nm.

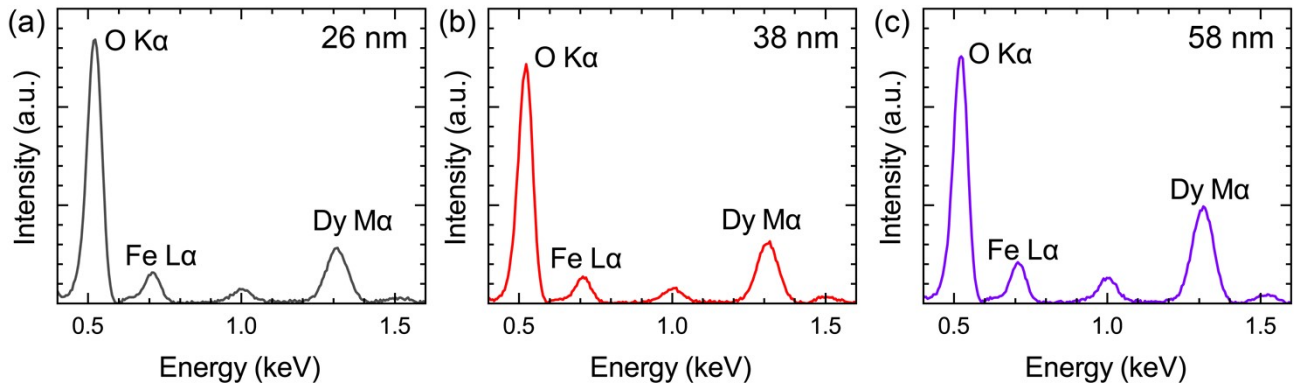

**Figure S5.** EDS spectra of the  $h$ -DyFeO<sub>3</sub> films. (a) 26 nm, (b) 38 nm, and (c) 58 nm.

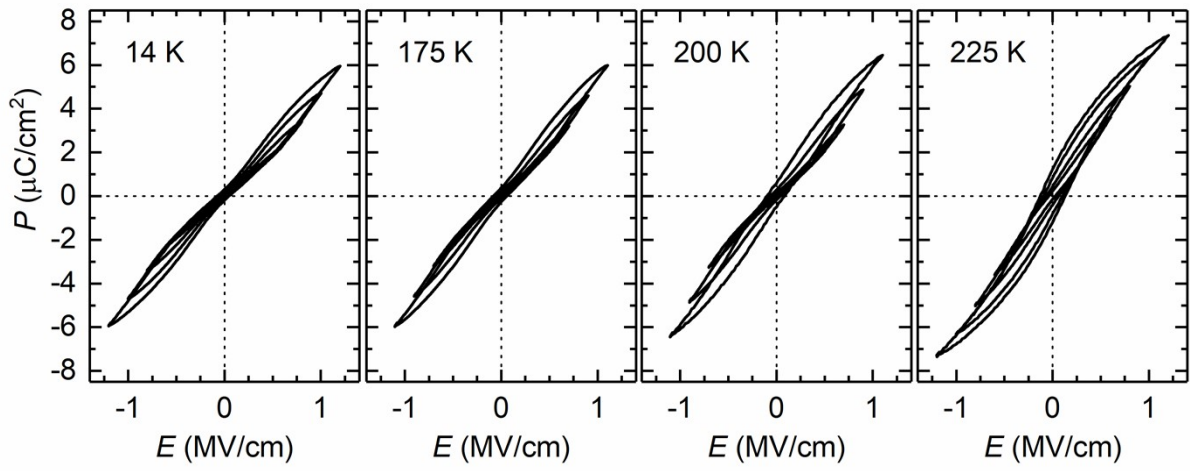

**Figure S6.**  $P$ - $E$  curves for the 38-nm-thick  $h$ -DyFeO<sub>3</sub> film at 14, 175, 200 and 225 K at 10 kHz.

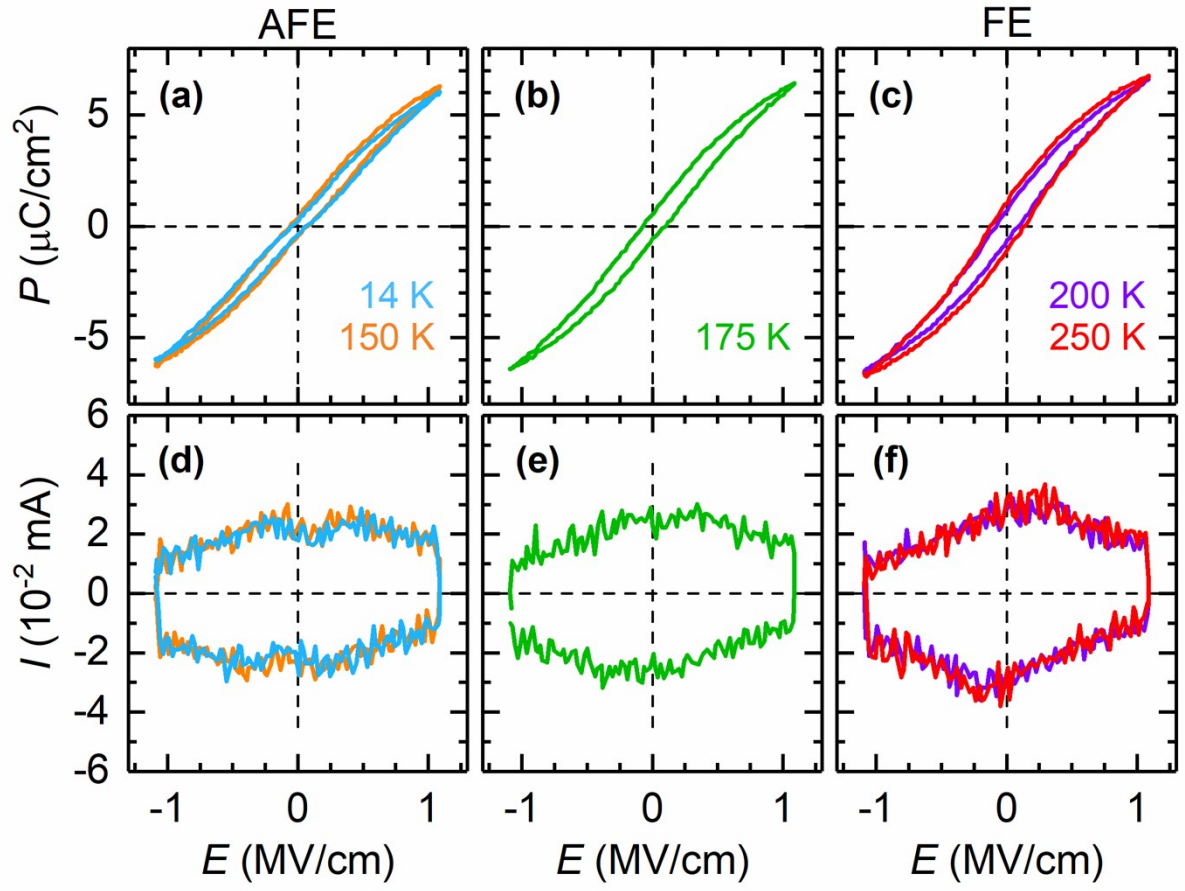

**Figure S7.** (a-c)  $P$ - $E$  and (d-f)  $I$ - $E$  curves for the 58-nm-thick  $h$ -DyFeO<sub>3</sub> film at (a, d) 14, 150, (b, e) 175, (c, f) 200 and 250 K at 10 kHz.



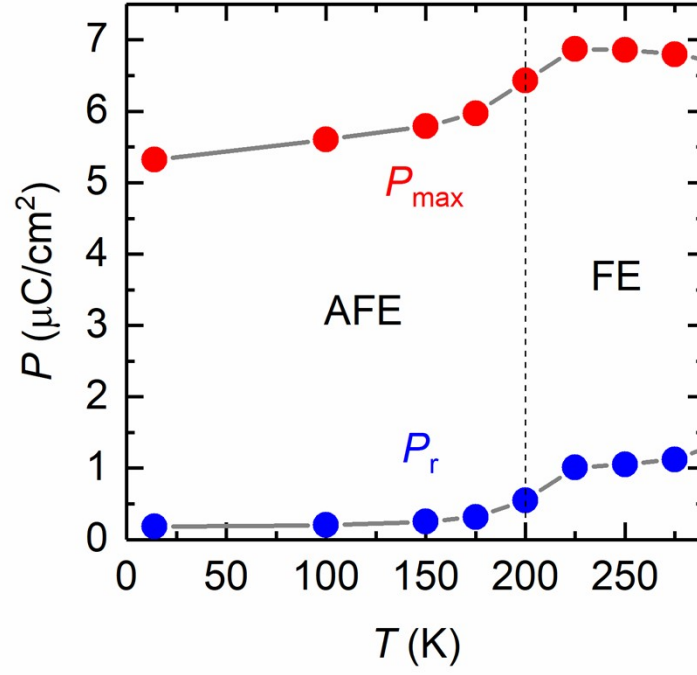

**Figure S8.**  $T$ -dependence of  $P_r$  and  $P_{\max}$  values for the 38-nm-thick film at 10 kHz with maximum applied  $E$  of 1.1 MV/cm.

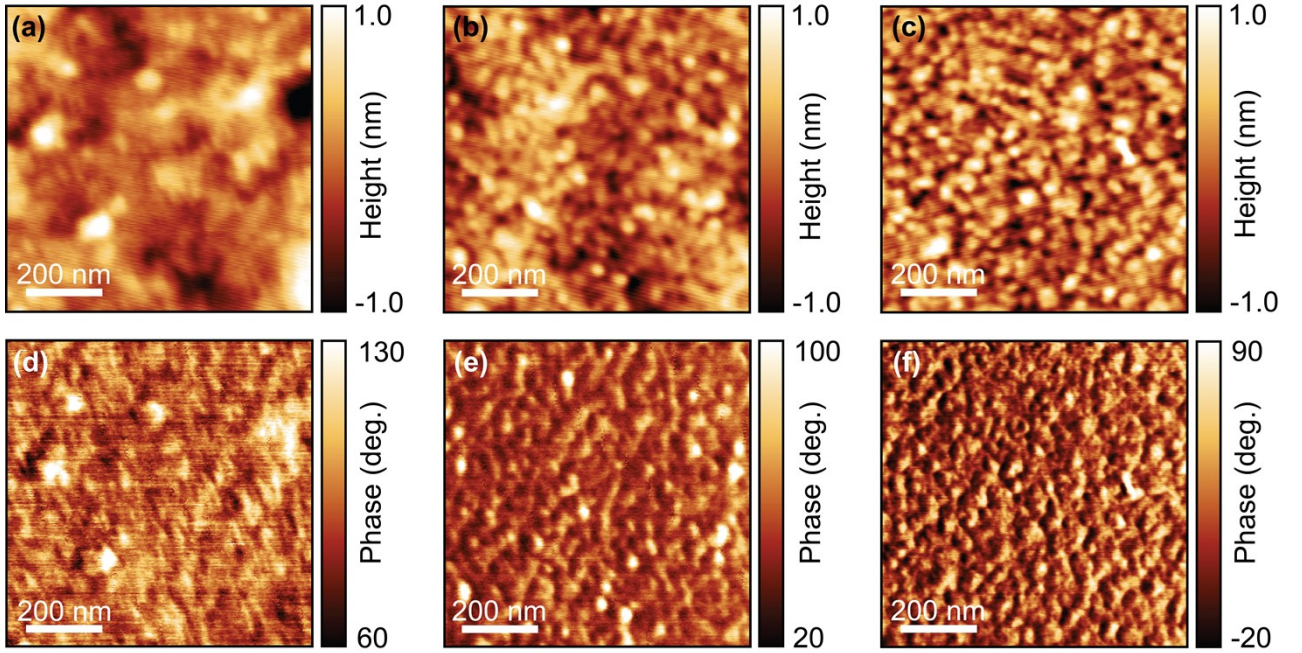

**Figure S9.** Piezoresponse force microscopy topography (Upper) and phase (Lower) images of the (a, d) 26-, (b, e) 38-, and (c, f) 58-nm-thick  $h$ -DyFeO<sub>3</sub> films.
